# Supplementary material for: Early Canopy Management Practices Differentially Modulate Fruit Set, Fruit Yield, and Berry Composition at Harvest Depending on the Grapevine Cultivar
Source: MDPI journal article supplement (doi:10.3390/plants12040733), 2023-02-07
Supplement: s1 [file s1]

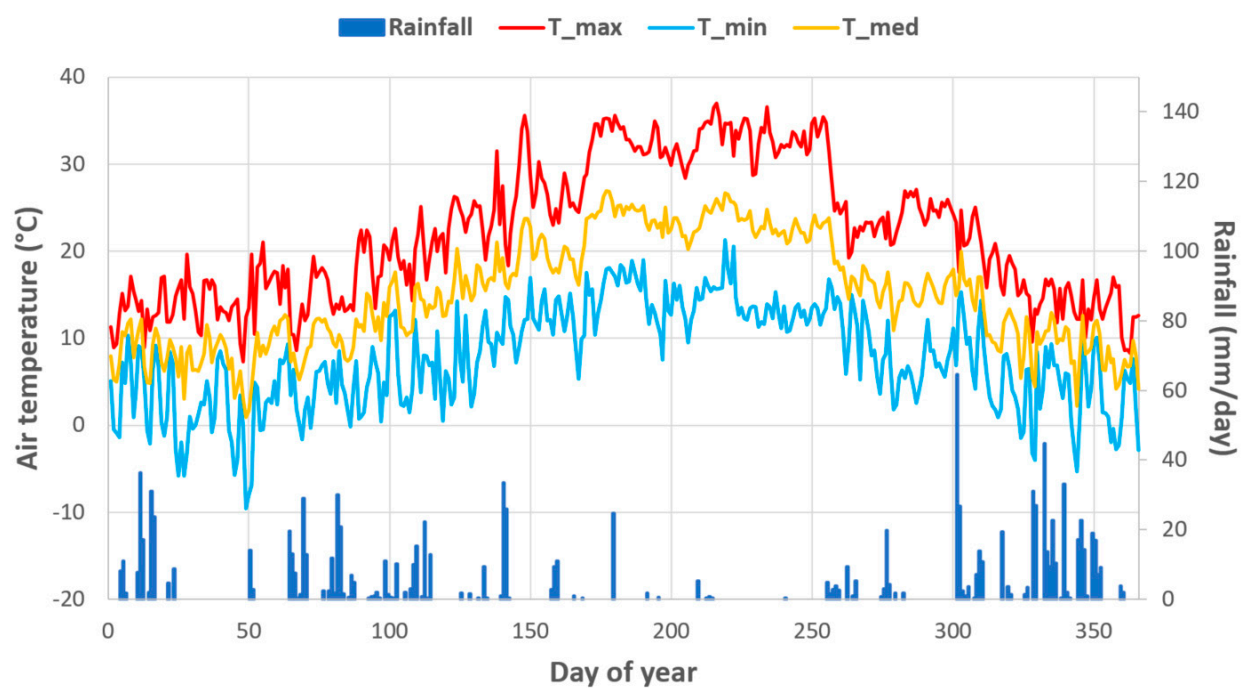

**Figure S1.** Seasonal pattern of daily minimum (azure line), maximum (red line), and mean air temperature (yellow line), and of daily rainfall (blue bars) measured in 2008.
